# Supplementary material for: Leaf defenses of subtropical deciduous and evergreen trees to varying intensities of herbivory
Source: PeerJ. 2023 Nov 7;11:e16350. doi: 10.7717/peerj.16350 (PMC10637251; doi:10.7717/peerj.16350)
Supplement: Supplemental Information 2 [file peerj-11-16350-s002.xlsx]

## Sheet: All plants
Number	Species	Leaf herbivory level	Leaf habit	15N	13C	N (%)	C (%)	P (g/kg)	Tannin (%)	Lignin (%)	cellulose (%)	Hemicellulose (%)	NSC (%)
1	Alniphyllum fortunei	A	Deciduous	1.601	-30.7	2.78098	56.9284	1.94439	1.15804	23.5016	20.0065	18.3571	15.9352				Leaf herbivory level were classified as no attcck (A), low (<10%)(B), medium (10-50%) (C) and high (>50%) (D).
2	Alniphyllum fortunei	B	Deciduous	0.636	-31.388	2.25844	57.1593	1.34522	1.38833	25.6886	18.2697	17.8625	11.9662
3	Alniphyllum fortunei	C	Deciduous	0.609	-31.911	2.30539	57.9037	1.16754	1.55844	24.5862	23.1792	18.0627	12.7876
4	Alniphyllum fortunei	D	Deciduous	1.813	-30.826	2.71481	53.6101	1.3898	1.34816	27.9357	19.4949	18.4135	15.6116
5	Alniphyllum fortunei	A	Deciduous						2.46398	21.2896	15.1392	19.0491	13.8
6	Alniphyllum fortunei	B	Deciduous	1.526	-32.145	2.06768	57.7703	1.0851	2.44255	28.0995	14.2405	15.4581	10.3278
7	Alniphyllum fortunei	C	Deciduous	0.637	-32.176	2.0125	57.9464	1.12679	3.15023	29.0397	18.6145	18.4088	10.3403
8	Alniphyllum fortunei	D	Deciduous	0.766	-32.248	2.20952	58.1211	1.33175	2.53908	30.4317	19.1112	18.0385	13.8459
9	Alniphyllum fortunei	A	Deciduous	1.146	-32.672	2.29772	55.9128	1.01377	0.690927	25.7972	28.198	15.8	17.6812
10	Alniphyllum fortunei	B	Deciduous	0.439	-32.567	2.49072	58.0055	1.37358	0.972367	26.4186	23.1975	15.6312	14.6441
11	Alniphyllum fortunei	C	Deciduous	7.028	-32.179	1.85015	56.8269		0.875926	26.0512	17.5005	17.8752	13.5498
12	Alniphyllum fortunei	D	Deciduous	-1.124	-31.784	1.46658	57.6091		1.95744	29.0164	19.7506	17.8552	16.0307
13	Alniphyllum fortunei	A	Deciduous	-0.999	-31.849	2.84949	57.7116	1.44016	1.0321	22.4813	21.8178	19.7709	16.573
14	Alniphyllum fortunei	B	Deciduous	-0.934	-31.395	3.07185	56.9068	1.98584	0.909526	27.3681	20.584	16.297	14.7704
15	Alniphyllum fortunei	C	Deciduous	-0.094	-31.652	2.76654	57.1062	1.5262	1.21823	28.0373	19.0886	17.4293	14.7801
16	Alniphyllum fortunei	D	Deciduous	0.117	-31.918	2.5763	57.6663	1.54996	1.18516	27.8522	18.8023	17.3944	15.7116
17	Alniphyllum fortunei	A	Deciduous	-1.312	-31.712	2.26728	57.0847	1.18593	2.05879	21.4895	16.0678	17.6308	13.4193
18	Alniphyllum fortunei	B	Deciduous	-1.041	-32.2	2.05396	58.1822	1.08407	1.91957	22.9268	13.7166	16.148	13.5525
19	Alniphyllum fortunei	C	Deciduous	-1.111	-31.901	2.16961	58.1556	1.09668	2.18635	28.9789	17.8993	17.2588	10.244
20	Alniphyllum fortunei	D	Deciduous	-0.804	-32.256	1.99311	57.8443	1.31649	1.19117	27.9719	19.2671	17.4463	15.851
21	Liquidambar formosana	A	Deciduous	-0.515	-30.848	1.84293	55.5465	1.09183	0.988145	20.5771	16.351	19.5808	9.62923
22	Liquidambar formosana	B	Deciduous	-0.142	-30.785	1.85549	55.3996	1.12205	0.885584	24.3674	16.4016	15.2574	11.123
23	Liquidambar formosana	C	Deciduous	-0.147	-30.883	1.85291	55.9791	1.16324	1.0137	22.0261	13.4766	16.2893	10.0304
24	Liquidambar formosana	D	Deciduous	-0.39	-30.948	1.74933	55.2578	1.35688	1.00575	27.1388	18.3967	17.7576	10.1319
25	Liquidambar formosana	A	Deciduous	2.481	-30.368	1.42092	56.3686	1.18217	1.53624	23.4579	18.6556	17.1938	11.6391
26	Liquidambar formosana	B	Deciduous	-3.032	-30.154	1.48115	56.9147	1.12747	1.5285	24.2262	17.9427	16.9427	12.5768
27	Liquidambar formosana	C	Deciduous	-3.671	-30.302	1.42554	57.3993	1.14484	1.58779	23.0915	16.583	17.3781	12.5651
28	Liquidambar formosana	D	Deciduous	-3.84	-30.071	1.27253	56.4612	1.19221	1.92992	29.5591	19.6767	18.5625	12.0436
29	Liquidambar formosana	A	Deciduous	-3.856	-30.957	1.58296	56.7353	1.23973	1.02845	21.1869	21.1654	19.0638	11.5378
30	Liquidambar formosana	B	Deciduous	-3.749	-30.956	1.71348	56.4823	1.31374	0.924066	21.3543	17.6307	18.264	11.4698
31	Liquidambar formosana	C	Deciduous	-3.796	-30.987	1.66094	56.5416	1.13218	0.91604	22.466	16.8901	18.2108	11.0985
32	Liquidambar formosana	D	Deciduous	-3.824	-31.088	1.65617	56.5916	1.20869	0.954655	27.7024	18.4955	18.8111	11.1429
33	Liquidambar formosana	A	Deciduous	-3.205	-30.498	1.86734	57.0615	1.3877	0.705578	21.075	17.9404	18.391	14.7937
34	Liquidambar formosana	B	Deciduous	-3.044	-30.488	1.87548	57.8884	1.11126	0.536039	21.0084	16.2248	16.1486	14.6634
35	Liquidambar formosana	C	Deciduous	-3.442	-30.69	1.79431	57.2553	1.21032	0.743254	22.4651	16.2482	15.3345	13.1969
36	Liquidambar formosana	D	Deciduous						1.20947	28.9552	16.6704	17.7788	13.6948
37	Liquidambar formosana	A	Deciduous	-3.492	-31.391	1.47892	56.2776	1.04269	0.924384	20.6231	17.2167	18.0836	14.5392
38	Liquidambar formosana	B	Deciduous	-3.256	-31.417	1.53682	56.6675	0.869359	0.80814	23.8077	17.0867	16.3821	14.2016
39	Liquidambar formosana	C	Deciduous	-2.789	-31.191	1.31197	55.9576		1.60979	21.3463	21.1781	15.6935	13.9414
40	Liquidambar formosana	D	Deciduous						1.27069	29.0959	18.9552	18.1973	13.9094
41	Castanopsis tibetana	A	Evergreen	-0.122	-31.226	1.27058	60.2574	0.815667	2.37607	26.7465	19.7536	18.8022	8.25862
42	Castanopsis tibetana	B	Evergreen	-0.187	-31.136	1.24275	60.8062	0.762789	2.45869	28.6679	17.6126	19.3657	6.70883
43	Castanopsis tibetana	C	Evergreen	-0.18	-31.103	1.41629	60.4808	0.902613	2.37873	25.4613	16.8716	18.2837	8.13597
44	Castanopsis tibetana	D	Evergreen	-0.634	-31.05	1.1711	60.2854	0.817972	2.36573	29.392	17.3827	19.2834	7.95167
45	Castanopsis tibetana	A	Evergreen	0.368	-30.697	1.4933	60.1283	0.863088	2.62393	28.832	17.9262	19.5664	7.92651
46	Castanopsis tibetana	B	Evergreen	0.801	-30.41	1.59968	61.2219	0.920635	2.65601	25.3643	17.0919	19.6623	5.82845
47	Castanopsis tibetana	C	Evergreen	0.286	-30.433	1.44571	60.7353	0.810191	2.80115	26.5022	17.0945	19.2245	8.19713
48	Castanopsis tibetana	D	Evergreen	0.341	-30.408	1.64032	60.6726	0.829824	2.46237	30.0134	17.5945	20.0637	8.48856
49	Castanopsis tibetana	A	Evergreen	4.544	-31.77	1.22642	59.545	0.602822	2.55309	29.368	18.0964	18.0068	7.77091
50	Castanopsis tibetana	B	Evergreen	-1.947	-31.491	1.1407	59.2948	0.590574	2.78472	29.5783	18.0677	19.3884	6.67644
51	Castanopsis tibetana	C	Evergreen	-2.046	-31.553	1.16986	59.493	0.689087	2.65331	27.4994	18.5981	18.004	8.09934
52	Castanopsis tibetana	D	Evergreen	-1.887	-31.567	1.1623	59.4937	0.750459	2.98691	29.8393	17.9085	20.4203	8.46401
53	Castanopsis tibetana	A	Evergreen	0.519	-31.713	1.3858	59.7543		2.17838	26.7136	19.0358	19.4379	9.61611
54	Castanopsis tibetana	B	Evergreen	0.466	-31.873	1.47623	60.0357	0.775502	2.25754	26.1373	17.3242	18.1812	8.4076
55	Castanopsis tibetana	C	Evergreen	0.051	-31.807	1.33588	59.9875	0.798737	2.42259	27.019	16.3743	19.6115	7.43673
56	Castanopsis tibetana	D	Evergreen	-0.149	-31.835	1.33471	59.3989	0.810236	2.41604	28.565	18.8194	19.6813	7.28048
57	Castanopsis tibetana	A	Evergreen	0.299	-30.058	1.2575	60.5328	1.05653	2.46668	28.2694	19.5004	19.0721	7.80947
58	Castanopsis tibetana	B	Evergreen	-0.303	-30.942	1.23684	60.1213	0.81565	2.6298	29.0551	17.9082	19.0877	7.41254
59	Castanopsis tibetana	C	Evergreen	0.397	-30.42	1.42884	60.9222	0.833878	2.38939	28.0768	17.6831	19.6372	8.02315
60	Castanopsis tibetana	D	Evergreen	-0.029	-30.557	1.18103	60.6021	0.777067	2.51351	28.9099	18.9874	20.6456	7.28688
61	Machilus thunbergii	A	Evergreen	-0.501	-31.172	1.19865	60.9277	0.981609	0.907072	20.3491	14.982	19.7095	7.82201
62	Machilus thunbergii	B	Evergreen	-0.433	-31.382	1.10532	60.7112	0.968293	0.882807	19.6154	13.3486	16.2952	7.98573
63	Machilus thunbergii	C	Evergreen	-0.385	-31.78	1.17198	61.1673	0.830713	0.974591	21.4367	14.2423	18.1689	7.1681
64	Machilus thunbergii	D	Evergreen	-0.71	-31.61	1.04141	60.4267	0.716149	0.991083	21.6089	15.6631	19.0396	7.0002
65	Machilus thunbergii	A	Evergreen	-0.218	-30.947	1.3794	61.1912	0.873351	0.688005	20.2769	17.1103	18.2745	7.93156
66	Machilus thunbergii	B	Evergreen	-0.628	-30.93	1.31744	62.1396	0.783465	0.787177	20.0202	13.1983	16.1667	6.92206
67	Machilus thunbergii	C	Evergreen	-0.719	-31.314	1.24572	61.4953	1.03624	0.793396	20.4219	15.978	16.8077	5.73146
68	Machilus thunbergii	D	Evergreen	-0.473	-31.141	1.25989	62.1358	0.853967	0.863327	22.0709	16.107	18.3756	7.08353
69	Machilus thunbergii	A	Evergreen	-0.925	-33.891	1.51095	61.0632	1.08925	0.572763	19.1948	16.0898	15.8406	8.28103
70	Machilus thunbergii	B	Evergreen	-1.207	-33.777	1.45903	60.2611	0.844402	0.679638	20.5737	14.3155	15.7442	7.09718
71	Machilus thunbergii	C	Evergreen	-1.139	-33.8	1.38154	59.9399	0.912942	0.704513	20.0904	12.9709	17.1121	4.75636
72	Machilus thunbergii	D	Evergreen	-1.206	-33.69	1.33585	59.9025	0.941924	0.670753	20.844	16.1769	18.0402	6.69374
73	Machilus thunbergii	A	Evergreen	-0.696	-32.503	1.16399	60.9245	0.705043	0.594146	18.5632	15.5425	17.9196	5.31308
74	Machilus thunbergii	B	Evergreen	-4.756	-32.396	1.10654	60.6658	0.767055	0.585291	20.236	14.2067	17.4293	6.51232
75	Machilus thunbergii	C	Evergreen	-4.853	-32.323	1.04076	60.9821	0.746154	0.67253	19.6733	14.707	15.8823	7.16585
76	Machilus thunbergii	D	Evergreen	-4.255	-31.199	1.25079	64.8676	1.0411	0.67738	19.8713	15.6792	18.5045	6.94891
77	Machilus thunbergii	A	Evergreen	-5.43	-32.206	1.00552	57.8023	0.842029	0.63877	19.3317	17.2461	17.5683	6.1222
78	Machilus thunbergii	B	Evergreen	-4.275	-31.496	1.20524	62.4053	0.884834	0.768685	20.4502	14.3771	15.3397	5.71714
79	Machilus thunbergii	C	Evergreen	-4.397	-31.433	1.13899	62.0391	0.851716	0.741827	20.1202	14.0469	17.4116	5.78632
80	Machilus thunbergii	D	Evergreen	-4.684	-31.486	1.06621	61.4893	0.990234	0.78104	22.0557	16.32	17.867	3.33624
81	Daphniphyllum oldhamii	A	Evergreen	0.437	-32.172	1.89659	57.8665	1.06561	0.154443	23.1639	22.4997	17.6747	14.3081
82	Daphniphyllum oldhamii	B	Evergreen	-0.3	-32.087	1.965	58.3695	0.944865	0.180919	25.3776	22.2467	17.0434	13.9081
83	Daphniphyllum oldhamii	C	Evergreen	1.491	-32.04	1.7239	57.1068	0.992276	0.261247	25.7177	26.2906	19.2004	14.65
84	Daphniphyllum oldhamii	D	Evergreen	-0.396	-31.978	1.69124	57.5284	1.16984	0.247991	27.5559	30.67	19.3863	14.0418
85	Daphniphyllum oldhamii	A	Evergreen	-1.18	-31.427	1.65134	56.4032	0.997334	0.186214	24.0157	28.8427	19.1457	15.6597
86	Daphniphyllum oldhamii	B	Evergreen	3.05	-31.555	1.91184	58.4909	1.02611	0.16258	27.2569	22.6353	18.0221	11.0941
87	Daphniphyllum oldhamii	C	Evergreen	-0.387	-31.617	1.60055	58.013	0.915295	0.251521	26.3487	25.2462	20.3396	13.6491
88	Daphniphyllum oldhamii	D	Evergreen	-1.103	-31.272	1.66833	57.2993	1.30893	0.422733	27.2964	32.0481	20.1219	12.4049
89	Daphniphyllum oldhamii	A	Evergreen	-1.202	-31.168	2.00586	58.6556	0.8904	0.194563	24.9569	28.2255	18.4879	13.4337
90	Daphniphyllum oldhamii	B	Evergreen	-0.795	-31.08	2.35391	59.487	1.27183	0.204542	24.6197	25.0096	18.1726	12.3419
91	Daphniphyllum oldhamii	C	Evergreen	-1.177	-31.415	2.13226	60.7449	0.987277	0.356246	25.1324	26.9921	18.008	14.4847
92	Daphniphyllum oldhamii	D	Evergreen	-1.624	-31.926	1.87475	58.7627	1.00786	0.319652	26.401	28.8735	18.3667	11.9589
93	Daphniphyllum oldhamii	A	Evergreen	-2.604	-30.438	1.83734	57.7267	1.00504	0.338486	28.0694	27.7691	19.4682	15.2337
94	Daphniphyllum oldhamii	B	Evergreen	-2.457	-29.93	1.75932	58.2869	0.998441	0.27708	25.1187	25.2621	18.1497	14.1089
95	Daphniphyllum oldhamii	C	Evergreen	-2.131	-30.167	1.88455	59.3696	1.15109	0.347449	26.9123	25.4949	18.3034	13.271
96	Daphniphyllum oldhamii	D	Evergreen	-2.708	-30.016	1.68105	58.3888	1.0115	0.393568	29.174	27.2936	19.3478	13.3155
97	Daphniphyllum oldhamii	A	Evergreen	-2.535	-30.635	1.77233	57.696	0.98565	0.221215	25.1764	28.7331	19.3334	14.3095
98	Daphniphyllum oldhamii	B	Evergreen	-2.269	-30.703	1.76755	58.0859	0.938641	0.211626	23.8644	25.3569	18.0564	12.2195
99	Daphniphyllum oldhamii	C	Evergreen	-2.54	-30.873	1.77618	57.1376	0.874217	0.244314	25.3759	26.9787	19.8955	13.9893
100	Daphniphyllum oldhamii	D	Evergreen	-2.313	-29.913	1.88099	60.3657	1.50513	0.412541	28.3017	27.7354	19.2575	12.5974
101	Padus buergeriana	A	Deciduous	-1.491	-33.005	2.86757	61.8339	1.61252	0.690927	24.7997	22.3179	16.0965	14.8273
102	Padus buergeriana	B	Deciduous	-1.572	-32.941	2.81369	62.4861	1.4977	0.668142	24.0562	17.3968	15.4982	14.2267
103	Padus buergeriana	C	Deciduous	-1.644	-32.829	2.65031	61.8913	1.40649	0.678368	25.6892	21.3221	14.3738	14.063
104	Padus buergeriana	D	Deciduous	-1.589	-32.841	2.41895	61.22	1.48019	0.699747	27.049	22.476	16.2821	14.7283
105	Padus buergeriana	A	Deciduous	0.592	-33.128	2.51741	61.1445	1.89218	0.647071	24.9829	22.1225	15.8142	14.8153
106	Padus buergeriana	B	Deciduous	0.39	-33.007	2.46489	60.68	1.49159	0.733123	22.9696	20.5434	15.5353	11.783
107	Padus buergeriana	C	Deciduous	0.399	-33.095	2.4227	61.2384	1.5252	0.731023	22.5155	20.5673	16.3053	12.5634
108	Padus buergeriana	D	Deciduous	0.778	-32.793	2.23532	58.9542	1.54888	0.684648	29.6396	20.8373	16.9857	14.2413
109	Padus buergeriana	A	Deciduous	1.452	-31.696	3.18761	60.6477	1.58303	0.563249	24.3092	21.9431	14.3604	14.5698
110	Padus buergeriana	B	Deciduous	-0.666	-31.621	2.99071	60.5355	1.63816	0.565562	20.6782	20.2031	15.1172	13.0518
111	Padus buergeriana	C	Deciduous	-0.985	-31.558	2.90522	60.0337	1.62004	0.60511	23.3047	21.292	14.5693	13.9436
112	Padus buergeriana	D	Deciduous	-0.742	-31.434	2.81994	59.6878	1.43128	0.659713	28.1714	22.271	15.9393	13.6766
113	Padus buergeriana	A	Deciduous	-1.824	-32.242	3.23352	62.5074	1.42687	0.684648	23.679	21.7249	15.7763	13.7147
114	Padus buergeriana	B	Deciduous	-1.668	-32.323	3.17998	62.2532	1.38985	0.567435	20.9192	19.6239	15.5048	11.7273
115	Padus buergeriana	C	Deciduous	-1.759	-32.303	2.92691	61.5198	1.48351	0.632321	24.0986	20.5684	15.8014	13.1657
116	Padus buergeriana	D	Deciduous	-1.632	-32.201	2.70939	61.971	1.3561	0.699522	31.2576	22.1568	16.2846	13.0495
117	Padus buergeriana	A	Deciduous	-2.25	-32.544	2.61865	61.2301	1.48984	0.69764	22.5353	23.8569	17.2696	14.713
118	Padus buergeriana	B	Deciduous	-2.101	-32.711	2.3425	60.9085	1.23144	0.799214	21.0896	20.9694	16.4744	12.8923
119	Padus buergeriana	C	Deciduous	-1.856	-32.637	2.30404	61.1118	1.02857	0.777708	23.4986	21.0527	15.2357	13.8165
120	Padus buergeriana	D	Deciduous	-1.698	-32.722	2.1896	61.1187	1.37778	0.912794	27.3449	22.7446	15.8556	12.463
121	Rhododendron latoucheae	A	Evergreen	-2.21	-32.436	0.981441	59.2953	1.02619	1.09017	25.2276	17.0718	19.7372	7.62876
122	Rhododendron latoucheae	B	Evergreen	-2.633	-32.363	0.971493	60.1317	0.622436	1.2979	23.2699	17.0325	17.8607	7.94461
123	Rhododendron latoucheae	C	Evergreen	-2.575	-32.024	0.950908	59.5364	0.614793	1.29542	24.4288	17.1922	19.5345	7.93986
124	Rhododendron latoucheae	D	Evergreen	-2.692	-32.049	0.928453	60.3896	0.447771	1.42653	27.6805	17.8132	19.6714	7.01228
125	Rhododendron latoucheae	A	Evergreen	-1.172	-31.692	0.973436	60.1162	0.658553	2.0409	25.129	17.5709	20.0474	8.84021
126	Rhododendron latoucheae	B	Evergreen	-1.2	-31.722	0.919126	59.3884	0.834857	1.80042	24.0589	15.2976	19.7681	8.71921
127	Rhododendron latoucheae	C	Evergreen	-1.145	-31.943	0.990654	60.172	0.665663	1.6765	23.9851	16.6704	19.8162	8.31949
128	Rhododendron latoucheae	D	Evergreen	-1.339	-31.622	0.959463	59.3593	0.638554	1.73177	26.4735	18.3968	20.2518	9.00146
129	Rhododendron latoucheae	A	Evergreen	-2.693	-30.793	0.844178	58.6969	0.634783	1.68375	24.2762	16.3269	20.3065	6.98029
130	Rhododendron latoucheae	B	Evergreen	-2.669	-30.875	0.929199	59.6278	0.592063	1.86083	26.6514	16.2405	20.146	7.40658
131	Rhododendron latoucheae	C	Evergreen	-2.218	-31.011	0.901726	58.9827	0.736478	2.02103	23.4928	15.887	19.0312	8.25077
132	Rhododendron latoucheae	D	Evergreen	-2.687	-30.727	0.856928	59.5205	0.683735	1.91778	30.018	17.5528	19.8301	6.97104
133	Rhododendron latoucheae	A	Evergreen	1.653	-31.765	0.910443	58.9506	0.805747	1.73546	29.0198	18.9707	20.0841	7.76705
134	Rhododendron latoucheae	B	Evergreen	-1.565	-31.464	0.887431	58.8451	0.634395	1.90139	25.6496	16.3734	19.775	8.15414
135	Rhododendron latoucheae	C	Evergreen	-1.349	-31.806	0.905583	58.2246	0.535948	2.0113	24.8339	17.1583	20.4096	8.21379
136	Rhododendron latoucheae	D	Evergreen	-0.258	-31.506	0.790449	58.07	1.42544	1.93361	32.0879	17.739	20.4143	7.30376
137	Rhododendron latoucheae	A	Evergreen	-1.306	-31.306	0.873781	60.4593	1.60571	1.78119	24.7136	17.4842	20.1744	8.94349
138	Rhododendron latoucheae	B	Evergreen	-1.91	-30.862	0.80163	59.5907	0.73224	1.78415	27.1735	17.9194	19.3478	7.85807
139	Rhododendron latoucheae	C	Evergreen	-1.754	-31.475	0.946855	60.6321	0.702825	1.69701	23.1596	17.124	19.2193	7.98318
140	Rhododendron latoucheae	D	Evergreen	-1.842	-30.99	0.787711	59.8219	0.757143	1.66723	27.4153	18.2186	19.5373	7.63451
141	Quercus acutissima	A	Deciduous	-2.728	-30.8	1.7521	57.478	2.62078	1.71871	25.1687	24.5939	19.8609	11.9283
142	Quercus acutissima	B	Deciduous	-2.694	-30.74	1.78763	57.9863	1.19805	1.5359	21.5504	23.6374	19.775	17.7606
143	Quercus acutissima	C	Deciduous	-2.796	-30.668	1.79688	57.9339	0.903086	1.45935	20.1581	26.4162	18.1149	14.871
144	Quercus acutissima	D	Deciduous	-3.081	-30.041	1.47179	56.6239	0.944872	1.88296	25.5343	25.2336	19.8492	17.6083
145	Quercus acutissima	A	Deciduous	0.086	-31.3	2.385	58.5323	1.38026	1.02226	28.6896	25.0442	18.5172	13.6808
146	Quercus acutissima	B	Deciduous	-0.161	-31.247	2.37175	58.4624	1.47654	0.884001	23.3014	23.592	17.0385	15.6908
147	Quercus acutissima	C	Deciduous	-0.482	-31.192	2.11799	57.7964	1.11818	0.974481	23.5683	23.8048	19.5636	14.2593
148	Quercus acutissima	D	Deciduous	-0.144	-30.995	1.90258	56.944	1.20443	0.948207	29.8719	25.0701	19.2768	15.2732
149	Quercus acutissima	A	Deciduous	-0.863	-31.635	2.04742	58.6852	1.19262	1.39807	21.8798	24.598	19.9433	12.7272
150	Quercus acutissima	B	Deciduous	-0.835	-31.574	2.07237	58.2388	1.19494	1.40086	19.9578	23.4181	16.4099	15.1474
151	Quercus acutissima	C	Deciduous	-0.858	-31.439	2.02565	58.7783	1.18715	1.31762	20.0761	22.6573	17.3379	14.3478
152	Quercus acutissima	D	Deciduous	-1.274	-31.272	1.92035	58.4595	1.17625	1.58456	24.2776	23.4149	18.2141	14.0112
153	Quercus acutissima	A	Deciduous	-0.945	-31.392	1.79977	58.852	1.18683	1.57999	22.8922	25.9385	18.7251	14.1026
154	Quercus acutissima	B	Deciduous	-1.391	-31.572	1.76773	57.8424	0.762346	1.44015	24.1773	26.6992	16.6319	13.4639
155	Quercus acutissima	C	Deciduous	-1.212	-31.406	1.70992	57.5253	1.3396	1.43708	21.9136	24.8613	18.7724	12.9027
156	Quercus acutissima	D	Deciduous	-1.25	-31.049	1.36081	54.4292	1.12635	1.77116	24.9726	24.9443	19.1631	13.4578
157	Quercus acutissima	A	Deciduous	1.309	-31.367	1.72961	52.9011	1.07118	1.66171	22.4073	25.6591	19.1073	11.0826
158	Quercus acutissima	B	Deciduous	-1.278	-31.523	1.84317	54.1187	0.980247	1.60041	23.148	23.7277	19.0464	14.7605
159	Quercus acutissima	C	Deciduous	-1.471	-31.385	1.63186	53.0234	1.04912	1.49589	22.5804	23.7728	18.4574	12.9653
160	Quercus acutissima	D	Deciduous	-1.411	-31.143	1.5092	50.0479	0.950641	1.75233	24.39	24.6307	19.8248	13.5862
161	Castanopsis carlesii	A	Evergreen	0.926	-33.198	1.73185	57.0405	1.21515	1.35585	25.7528	24.205	21.4522	6.71471
162	Castanopsis carlesii	B	Evergreen	1.66	-33.363	1.56007	56.2883	1.09268	1.49773	25.1248	17.059	18.0294	6.48211
163	Castanopsis carlesii	C	Evergreen	-0.826	-31.356	1.3354	55.2166	1.53846	1.57383	24.4521	23.4895	21.3822	8.85324
164	Castanopsis carlesii	D	Evergreen	1.775	-32.99	1.36855	55.682		1.50976	26.1599	23.7807	22.1884	6.84588
165	Castanopsis carlesii	A	Evergreen	-1.103	-31.978	1.51672	56.2688	1.04804	1.47881	25.6843	21.4924	21.4941	6.76429
166	Castanopsis carlesii	B	Evergreen	-1.238	-31.893	1.51852	56.8899	1.13315	1.40236	24.4746	20.7315	20.0623	6.80237
167	Castanopsis carlesii	C	Evergreen	-1.064	-31.831	1.44517	56.024	1.1541	1.39009	23.7389	21.8017	17.9548	7.86955
168	Castanopsis carlesii	D	Evergreen	-1.176	-31.888	1.52245	57.4734	1.23758	1.41732	26.3265	25.0744	20.3002	7.32443
169	Castanopsis carlesii	A	Evergreen	-1.726	-32.012	1.17107	54.6438	0.898844	1.81744	25.4395	24.3923	22.4767	7.33209
170	Castanopsis carlesii	B	Evergreen	-1.707	-32.022	1.33875	57.6227	0.899342	1.39401	22.4075	25.0606	22.3325	7.47395
171	Castanopsis carlesii	C	Evergreen	-1.883	-31.929	1.32159	56.6099	1.02733	1.65491	24.5812	24.5219	22.1533	7.69106
172	Castanopsis carlesii	D	Evergreen	-2.263	-31.938	1.22755	54.5548	0.95163	1.58891	23.845	25.2918	22.4886	7.49955
173	Castanopsis carlesii	A	Evergreen	-0.467	-32.074	1.46807	54.2959	1.1385	1.50538	21.8933	24.6121	21.614	7.48068
174	Castanopsis carlesii	B	Evergreen	-0.447	-25.408	1.29829	38.5366	1.34145	1.41264	22.2546	23.4889	21.1663	5.53422
175	Castanopsis carlesii	C	Evergreen	-0.181	-31.869	1.26661	51.9801	1.0881	1.5644	22.8726	22.8637	18.2631	7.76396
176	Castanopsis carlesii	D	Evergreen	-0.379	-24.585	1.3676	37.3894	1.12216	1.68898	24.1533	26.0906	21.0421	6.94524
177	Castanopsis carlesii	A	Evergreen	-0.798	-31.236	1.49022	52.7396	1.02147	1.64171	23.9658	25.5178	19.3349	6.60179
178	Castanopsis carlesii	B	Evergreen	-0.711	-31.149	1.58527	53.0901	1.1	1.59764	24.5688	25.0359	17.737	5.33231
179	Castanopsis carlesii	C	Evergreen	-0.819	-30.989	1.6355	54.8717	1.22595	1.67942	24.7205	22.061	18.3692	8.21243
180	Castanopsis carlesii	D	Evergreen	-0.471	-31.05	1.50019	52.9577	1.01776	1.77697	24.4557	25.3045	20.8975	6.44376
181	Schima superba	A	Evergreen	1.385	-31.358	1.33539	50.6643	1.05597	2.09175	24.6505	20.928	18.3674	8.10712
182	Schima superba	B	Evergreen	1.515	-31.743	1.3119	34.6112	1.07529	1.95365	23.9166	17.7881	17.9394	6.20926
183	Schima superba	C	Evergreen	1.691	-31.358	1.42337	53.9751	1.04558	2.02365	26.2967	20.2	18.4669	7.46372
184	Schima superba	D	Evergreen	1.768	-31.209	1.4146	51.6359	1.432	2.12536	26.1667	20.1336	19.5843	7.30468
185	Schima superba	A	Evergreen	0.642	-28.894	1.65341	55.3223	1.08966	1.90002	26.0529	21.6094	23.3498	8.04585
186	Schima superba	B	Evergreen	0.183	-28.903	1.64619	52.8989	1.15686	2.08669	24.4924	21.3812	16.3296	7.51778
187	Schima superba	C	Evergreen	-0.104	-28.951	1.59644	51.7756	1.10476	1.96602	24.446	22.8015	19.4896	8.27559
188	Schima superba	D	Evergreen	-0.354	-28.924	1.67704	55.1013	0.925904	1.74339	25.838	24.5974	21.1353	7.4616
189	Schima superba	A	Evergreen	-0.027	-29.113	1.53354	50.7179	0.82924	1.72084	26.6319	22.6778	21.2775	11.5248
190	Schima superba	B	Evergreen	-0.181	-29.077	1.71019	52.135	0.907027	1.79383	23.3654	21.7849	19.2954	9.71397
191	Schima superba	C	Evergreen	-0.541	-29.127	1.68212	55.111	0.863694	1.48376	28.0435	19.7438	17.6086	9.04875
192	Schima superba	D	Evergreen	-0.147	-28.274	1.54764	48.9696	1.09793	1.63982	29.1189	22.037	20.8231	10.1909
193	Schima superba	A	Evergreen	-0.351	-29.611	1.57599	53.4596	1.02407	2.00284	23.5214	22.5733	21.0249	9.70394
194	Schima superba	B	Evergreen	-0.19	-29.232	1.45049	49.5519	1.16577	1.81366	24.1104	21.9053	19.9887	8.96639
195	Schima superba	C	Evergreen	-0.311	-29.446	1.55385	51.5049	1.0578	2.04556	25.2473	20.6254	20.2179	9.01239
196	Schima superba	D	Evergreen	-0.837	-29.487	1.53794	50.3826	1.10633	1.94929	26.8627	23.1167	21.6037	8.2442
197	Schima superba	A	Evergreen	-0.321	-29.483	1.16081	50.3025	1.06747	2.01672	22.2679	22.2258	21.1646	8.39271
198	Schima superba	B	Evergreen	-0.156	-28.627	1.0539	50.1	1.0915	2.46748	23.9118	18.7456	17.4146	7.66932
199	Schima superba	C	Evergreen	-0.975	-29.302	1.03933	49.9722	0.91465	2.20526	23.8267	20.1793	18.1579	9.45172
200	Schima superba	D	Evergreen	-1.065	-27.838	1.14572	53.5597	0.913745	2.47389	28.4773	20.4817	18.3314	8.86565
201	Choerospondias axillaris	A	Deciduous	-1.414	-25.473	1.48122		1.18743	2.05535	34.5227	28.6041	16.8936	9.59797
202	Choerospondias axillaris	B	Deciduous	-1.473	-26.245	1.47279	46.7538	1.19799	1.6156	26.0972	25.6161	16.2382	9.37872
203	Choerospondias axillaris	C	Deciduous	-2.253	-29.552	1.28903	51.8198	1.36118	1.50285	24.2559	26.8313	14.3368	9.34985
204	Choerospondias axillaris	D	Deciduous	-2.806	-29.205	1.18673	51.6753	1.12365	1.8787	29.2837	27.9986	19.3184	8.58001
205	Choerospondias axillaris	A	Deciduous	-3.312	-30.498	1.5123	53.347	1.62171	1.8742	29.783	27.4846	18.4854	7.694
206	Choerospondias axillaris	B	Deciduous	-3.191	-30.483	1.48075	53.5833	1.41132	1.85751	28.9489	27.1631	17.0536	8.40185
207	Choerospondias axillaris	C	Deciduous	-3.088	-30.369	1.43667	53.9615	1.34251	2.42368	29.9824	26.3365	16.9146	8.58596
208	Choerospondias axillaris	D	Deciduous	-3.453	-30.298	1.4092	53.5242	0.837158	1.85939	30.455	26.2835	17.2601	8.11883
209	Choerospondias axillaris	A	Deciduous	-2.118	-32.163	1.29703	49.7815	1.47167	2.10101	31.6862	26.1716	15.4429	8.5686
210	Choerospondias axillaris	B	Deciduous	-2.773	-31.412	1.16762	50.3943	1.44724	1.99807	28.3302	27.0496	14.3071	8.77373
211	Choerospondias axillaris	C	Deciduous	-2.722	-31.694	1.2094	50.4177	1.22645	1.82005	29.2508	24.5747	18.9675	8.15484
212	Choerospondias axillaris	D	Deciduous	-2.478	-32.104	1.26404	50.3531	1.42452	1.74918	30.8608	23.8552	19.2756	7.86977
213	Choerospondias axillaris	A	Deciduous	-2.572	-29.656	1.68728	51.1939	1.01161	1.61372	21.4592	27.0403	18.4289	9.107
214	Choerospondias axillaris	B	Deciduous	-2.171	-28.985	1.64612	49.9962	0.90679	1.48736	25.8469	27.1726	16.2194	9.1044
215	Choerospondias axillaris	C	Deciduous	-2.572	-28.895	1.83146	51.8168	2.1677	1.22501	21.398	25.2614	14.2881	8.88781
216	Choerospondias axillaris	D	Deciduous	-2.211	-29.357	1.66641	51.2971	2.11813	1.5695	26.0461	26.5508	16.0761	8.81934
217	Choerospondias axillaris	A	Deciduous	-2.627	-30.208	1.10469	51.7899	1.3109	2.52224	34.759	26.2536	19.3913	9.01589
218	Choerospondias axillaris	B	Deciduous	-2.622	-29.997	1.0829	51.7707	1.66051	2.04669	33.3022	24.823	15.417	9.03145
219	Choerospondias axillaris	C	Deciduous	-3.088	-29.811	1.0915	51.3997	1.5897	2.22838	32.4898	24.2819	18.8009	8.68772
220	Choerospondias axillaris	D	Deciduous	-2.474	-30.913	1.1611	50.5331	0.809249	2.27712	34.8459	25.9409	18.9979	8.26701
221	Elaeocarpus japonicus	A	Evergreen	-0.978	-31.487	1.59714	51.5474	1.59945	1.70205	19.0058	21.7666	18.6592	12.2655
222	Elaeocarpus japonicus	B	Evergreen	-1.281	-31.513	1.45038	51.386	1.49226	1.85289	23.3007	20.904	17.904	12.2788
223	Elaeocarpus japonicus	C	Evergreen	-0.546	-31.406	1.25679	51.287	1.85399	2.29589	23.7225	16.8591	19.5648	12.4537
224	Elaeocarpus japonicus	D	Evergreen	-0.681	-31.401	1.34082	51.2782		2.32652	25.4709	20.6333	19.4504	11.8798
225	Elaeocarpus japonicus	A	Evergreen	-1.137	-30.752	1.31008	51.7697	1.62955	1.98117	24.5904	22.2317	18.8363	11.6762
226	Elaeocarpus japonicus	B	Evergreen	-1.452	-31.086	1.37221	51.3828	1.4441	1.85939	23.7423	21.6397	18.3214	12.3382
227	Elaeocarpus japonicus	C	Evergreen	-1.418	-30.8	1.15362	51.7338	1.2871	2.14264	24.4787	22.1032	18.3496	10.7541
228	Elaeocarpus japonicus	D	Evergreen						2.16399	25.4106	20.6914	18.9711	10.7656
229	Elaeocarpus japonicus	A	Evergreen	-4.062	-29.607	1.28321	51.652	1.63333	2.07979	24.3807	23.5622	18.3745	10.804
230	Elaeocarpus japonicus	B	Evergreen	-4.198	-29.887	1.08208	50.5278	1.20893	2.16166	24.1293	22.3059	17.7191	12.2365
231	Elaeocarpus japonicus	C	Evergreen	-4.351	-29.993	1.10739	50.5503	1.02291	2.41617	26.4598	18.7106	19.3335	10.2476
232	Elaeocarpus japonicus	D	Evergreen	-4.421	-29.438	0.97741	50.5427	0.642241	2.65663	26.7669	22.798	19.547	11.8161
233	Elaeocarpus japonicus	A	Evergreen	-2.642	-29.359	1.82775	54.5535	0.663243	1.67934	25.098	22.5321	17.8687	14.5538
234	Elaeocarpus japonicus	B	Evergreen	-2.958	-29.552	1.94178	54.7915	0.6275	1.45211	25.7597	22.7759	17.196	14.684
235	Elaeocarpus japonicus	C	Evergreen	-3.152	-29.546	1.72318	53.9365	0.683871	1.88687	24.4892	19.0436	17.7518	13.3571
236	Elaeocarpus japonicus	D	Evergreen	0.147	-30.521	1.56697	54.7424	0.6	2.37858	25.0868	20.1357	17.8199	11.6492
237	Elaeocarpus japonicus	A	Evergreen	-3.501	-29.213	1.42197	54.9904	0.781013	2.50184	25.2612	23.1237	19.5656	12.9517
238	Elaeocarpus japonicus	B	Evergreen	-3.826	-29.232	1.55405	55.5113	0.762581	2.31829	26.7343	21.4386	18.9204	12.5159
239	Elaeocarpus japonicus	C	Evergreen						2.43496	26.4158	17.2233	19.3902	11.6083
240	Elaeocarpus japonicus	D	Evergreen						2.5214	26.7836	20.2784	19.7522	11.9408
241	Acer wilsonii	A	Deciduous	-0.312	-31.859	2.20098	52.4669	1.73836	1.17802	19.8047	20.9826	21.5581	8.1145
242	Acer wilsonii	B	Deciduous	-0.398	-31.702	2.12214	52.1387	1.61346	0.863814	16.1592	19.7866	20.9956	8.79224
243	Acer wilsonii	C	Deciduous	-0.522	-31.604	2.40005	52.4833	1.58644	1.21292	20.6224	17.996	20.8533	7.90682
244	Acer wilsonii	D	Deciduous	-0.599	-31.48	2.30506	52.1207	1.53631	1.36228	20.4308	20.4714	21.5875	9.86395
245	Acer wilsonii	A	Deciduous	0.875	-31.634	2.18182	52.0794	1.84286	1.31374	18.3493	20.2656	21.2972	9.11124
246	Acer wilsonii	B	Deciduous	1.377	-31.753	2.31773	52.5325	1.66686	1.15137	19.3791	17.8626	20.4333	8.41361
247	Acer wilsonii	C	Deciduous	1.444	-31.763	2.20044	52.686	1.72216	1.12136	16.2633	19.1947	20.6272	7.72998
248	Acer wilsonii	D	Deciduous	1.15	-31.595	2.24779	52.212		1.37426	19.975	20.3314	20.9953	9.67407
249	Acer wilsonii	A	Deciduous	-0.803	-31.466	2.44434	52.4523	1.63429	1.30683	17.9424	19.2981	21.4173	7.36026
250	Acer wilsonii	B	Deciduous	-0.679	-31.444	2.33355	52.0722	1.75669	1.40236	18.7969	19.5504	20.184	8.06652
251	Acer wilsonii	C	Deciduous	-0.332	-31.31	2.33338	50.3297	1.68355	1.4258	17.5424	18.2181	20.4952	6.48203
252	Acer wilsonii	D	Deciduous	-0.512	-31.129	2.25785	50.5896	1.65032	1.45189	19.1204	20.801	20.8975	9.36623
253	Acer wilsonii	A	Deciduous	-1.156	-31.031	2.01828	51.227		2.01315	20.3595	21.1664	20.9956	8.70645
254	Acer wilsonii	B	Deciduous	-1.086	-31.235	2.43183	51.7995	1.19938	1.77181	21.5724	18.2898	20.8071	9.22795
255	Acer wilsonii	C	Deciduous	-1.095	-31.024	1.93112	51.5753	1.174	1.83491	22.9721	19.2613	21.8588	8.60357
256	Acer wilsonii	D	Deciduous	-0.98	-31.037	1.93444	51.2343	1.18763	1.90059	20.8876	19.1131	21.9812	9.04032
257	Acer wilsonii	A	Deciduous	0.581	-31.931	2.55679	50.6883	1.53276	1.16646	17.1742	20.7803	21.9253	5.86932
258	Acer wilsonii	B	Deciduous	0.532	-31.663	2.30578	50.5638	1.45497	1.31175	16.3659	20.3109	21.3647	7.97078
259	Acer wilsonii	C	Deciduous	0.572	-31.68	2.42697	51.2016	1.6359	1.44357	19.2741	18.0891	20.9506	6.78107
260	Acer wilsonii	D	Deciduous	1.874	-32.1	2.50532	45.629		1.48333	19.5784	18.7842	21.6577	12.0899
261	Sapium discolor	A	Deciduous	1.995	-31.897	3.00527	51.6882	1.10085	1.92831	25.479	19.0572	21.8536	10.5825
262	Sapium discolor	B	Deciduous	2.152	-32.202	2.21426	51.6614	0.972989	2.29615	24.5994	19.7591	19.2737	10.2886
263	Sapium discolor	C	Deciduous	2.213	-31.966	2.10007	51.7324	0.979503	2.41336	27.365	18.0405	18.1443	10.5866
264	Sapium discolor	D	Deciduous	2.138	-31.805	2.19397	52.0846	0.909581	2.73496	27.8462	17.3119	21.0113	9.77339
265	Sapium discolor	A	Deciduous	1.734	-30.917	2.93591	50.8895		1.74541	24.6372	20.8244	20.0268	10.2087
266	Sapium discolor	B	Deciduous	1.659	-30.555	2.87264	52.1088	1.00944	1.91203	24.355	20.125	19.8593	9.62577
267	Sapium discolor	C	Deciduous	1.778	-30.751	2.47464	51.7546	1.02469	2.00561	26.0133	17.241	20.0492	10.4553
268	Sapium discolor	D	Deciduous	2.032	-30.28	2.53294	51.6438		2.13616	26.3292	17.2405	20.6211	9.60726
269	Sapium discolor	A	Deciduous	0.328	-31.769	2.97857	51.0975	1.1404	1.20592	20.1559	19.6607	18.06	7.83408
270	Sapium discolor	B	Deciduous	0.359	-31.533	2.82043	51.2882	1.00172	1.37614	23.4803	19.3237	18.0647	10.1193
271	Sapium discolor	C	Deciduous	0.541	-31.583	2.52873	50.5624	1.05987	1.50908	21.8454	20.7226	19.0169	10.3741
272	Sapium discolor	D	Deciduous	1.224	-31.637	2.53281	48.9673		0.201964	25.1781	18.1158	19.0975	9.84278
273	Sapium discolor	A	Deciduous	2.274	-31.929	3.15977	52.0176	1.27368	1.76218	24.3619	20.3517	18.8767	11.8336
274	Sapium discolor	B	Deciduous	2.228	-31.483	3.14876	52.5476	1.24094	1.83923	23.871	19.6032	17.9735	11.5404
275	Sapium discolor	C	Deciduous	2.267	-31.731	2.86909	52.2306	1.09886	2.01692	26.3617	16.3353	18.4268	11.6751
276	Sapium discolor	D	Deciduous	2.322	-31.614	2.63673	52.0497	0.9	2.24696	25.4189	18.4956	18.8561	10.6502
277	Sapium discolor	A	Deciduous	-0.976	-31.65	2.46104	50.1693	1.08052	1.07645	24.795	20.969	19.1684	13.1607
278	Sapium discolor	B	Deciduous	-1.043	-31.698	2.40192	50.6589	1.06115	1.76386	23.8172	18.305	19.0488	11.5465
279	Sapium discolor	C	Deciduous	-0.876	-31.867	2.21034	50.1723	0.991573	2.98274	22.8674	18.4492	20.7023	11.98
280	Sapium discolor	D	Deciduous	-0.968	-31.79	2.20104	50.4201		2.0328	24.5536	20.7517	20.8682	11.5496

## Sheet: No leaf hebivory attack
Number	Repeat	Species	Leaf herbivory level (no attack)	Leaf habit	Leaf area removed (%)	Percentage of leaves attacked (%)	Important value (IV)	C (%)	N (%)	P (g/kg)	NSC (%)	Tannin (%)	Lignin (%)	cellulose (%)	Hemicellulose (%)	C/N	N/lignin	NSC/lignin	NSC/CELL	N/P	15N	13C
1	1	Alniphyllum fortunei	A	Deciduous	10	93.8061	9.93405	56.9284	2.78098	1.94439	15.9352	1.15804	23.5016	20.0065	18.3571	20.4707	0.118331	0.678046	0.796498	14.3026	1.601	-30.7
2	2	Alniphyllum fortunei	A	Deciduous	10	93.8061	9.93405				13.8	2.46398	21.2896	15.1392	19.0491			0.648203	0.911542
3	3	Alniphyllum fortunei	A	Deciduous	10	93.8061	9.93405	55.9128	2.29772	1.01377	17.6812	0.690927	25.7972	28.198	15.8	24.334	0.0890688	0.685393	0.627038	22.6651	1.146	-32.672
4	4	Alniphyllum fortunei	A	Deciduous	10	93.8061	9.93405	57.7116	2.84949	1.44016	16.573	1.0321	22.4813	21.8178	19.7709	20.2533	0.126749	0.737188	0.759607	19.7859	-0.999	-31.849
5	5	Alniphyllum fortunei	A	Deciduous	10	93.8061	9.93405	57.0847	2.26728	1.18593	13.4193	2.05879	21.4895	16.0678	17.6308	25.1776	0.105507	0.624461	0.835171	19.1182	-1.312	-31.712
6	1	Liquidambar formosana	A	Deciduous	4	46.9429	2.01719	55.5465	1.84293	1.09183	9.62923	0.988145	20.5771	16.351	19.5808	30.1403	0.0895624	0.467959	0.588908	16.8792	-0.515	-30.848
7	2	Liquidambar formosana	A	Deciduous	4	46.9429	2.01719	56.3686	1.42092	1.18217	11.6391	1.53624	23.4579	18.6556	17.1938	39.6705	0.0605731	0.49617	0.623894	12.0196	2.481	-30.368
8	3	Liquidambar formosana	A	Deciduous	4	46.9429	2.01719	56.7353	1.58296	1.23973	11.5378	1.02845	21.1869	21.1654	19.0638	35.8412	0.0747142	0.544574	0.545127	12.7686	-3.856	-30.957
9	4	Liquidambar formosana	A	Deciduous	4	46.9429	2.01719	57.0615	1.86734	1.3877	14.7937	0.705578	21.075	17.9404	18.391	30.5577	0.0886044	0.701955	0.824604	13.4564	-3.205	-30.498
10	5	Liquidambar formosana	A	Deciduous	4	46.9429	2.01719	56.2776	1.47892	1.04269	14.5392	0.924384	20.6231	17.2167	18.0836	38.0532	0.0717118	0.704994	0.844479	14.1837	-3.492	-31.391
11	1	Castanopsis tibetana	A	Evergreen	12	92.4185	1.81577	60.2574	1.27058	0.815667	8.25862	2.37607	26.7465	19.7536	18.8022	47.4251	0.0475046	0.308774	0.418082	15.5772	-0.122	-31.226
12	2	Castanopsis tibetana	A	Evergreen	12	92.4185	1.81577	60.1283	1.4933	0.863088	7.92651	2.62393	28.832	17.9262	19.5664	40.2654	0.0517931	0.27492	0.442175	17.3018	0.368	-30.697
13	3	Castanopsis tibetana	A	Evergreen	12	92.4185	1.81577	59.545	1.22642	0.602822	7.77091	2.55309	29.368	18.0964	18.0068	48.552	0.0417604	0.264605	0.429417	20.3446	4.544	-31.77
14	4	Castanopsis tibetana	A	Evergreen	12	92.4185	1.81577	59.7543	1.3858		9.61611	2.17838	26.7136	19.0358	19.4379	43.1189	0.0518763	0.359971	0.505158		0.519	-31.713
15	5	Castanopsis tibetana	A	Evergreen	12	92.4185	1.81577	60.5328	1.2575	1.05653	7.80947	2.46668	28.2694	19.5004	19.0721	48.1376	0.0444826	0.276252	0.400478	11.9022	0.299	-30.058
16	1	Machilus thunbergii	A	Evergreen	8	53.9259	2.38523	60.9277	1.19865	0.981609	7.82201	0.907072	20.3491	14.982	19.7095	50.8302	0.0589044	0.384391	0.522093	12.2111	-0.501	-31.172
17	2	Machilus thunbergii	A	Evergreen	8	53.9259	2.38523	61.1912	1.3794	0.873351	7.93156	0.688005	20.2769	17.1103	18.2745	44.3606	0.0680283	0.391162	0.463555	15.7944	-0.218	-30.947
18	3	Machilus thunbergii	A	Evergreen	8	53.9259	2.38523	61.0632	1.51095	1.08925	8.28103	0.572763	19.1948	16.0898	15.8406	40.4137	0.0787168	0.431421	0.514674	13.8715	-0.925	-33.891
19	4	Machilus thunbergii	A	Evergreen	8	53.9259	2.38523	60.9245	1.16399	0.705043	5.31308	0.594146	18.5632	15.5425	17.9196	52.3409	0.0627042	0.286215	0.341843	16.5095	-0.696	-32.503
20	5	Machilus thunbergii	A	Evergreen	8	53.9259	2.38523	57.8023	1.00552	0.842029	6.1222	0.63877	19.3317	17.2461	17.5683	57.485	0.0520142	0.316693	0.354991	11.9416	-5.43	-32.206
21	1	Daphniphyllum oldhamii	A	Evergreen	5	57.9255	4.22434	57.8665	1.89659	1.06561	14.3081	0.154443	23.1639	22.4997	17.6747	30.5108	0.081877	0.617687	0.635921	17.7982	0.437	-32.172
22	2	Daphniphyllum oldhamii	A	Evergreen	5	57.9255	4.22434	56.4032	1.65134	0.997334	15.6597	0.186214	24.0157	28.8427	19.1457	34.156	0.0687609	0.652063	0.542936	16.5575	-1.18	-31.427
23	3	Daphniphyllum oldhamii	A	Evergreen	5	57.9255	4.22434	58.6556	2.00586	0.8904	13.4337	0.194563	24.9569	28.2255	18.4879	29.242	0.0803731	0.538274	0.47594	22.5277	-1.202	-31.168
24	4	Daphniphyllum oldhamii	A	Evergreen	5	57.9255	4.22434	57.7267	1.83734	1.00504	15.2337	0.338486	28.0694	27.7691	19.4682	31.4186	0.065457	0.542713	0.548582	18.2813	-2.604	-30.438
25	5	Daphniphyllum oldhamii	A	Evergreen	5	57.9255	4.22434	57.696	1.77233	0.98565	14.3095	0.221215	25.1764	28.7331	19.3334	32.5538	0.0703965	0.568372	0.498017	17.9813	-2.535	-30.635
26	1	Padus buergeriana	A	Deciduous	8	62.578	1.10504	61.8339	2.86757	1.61252	14.8273	0.690927	24.7997	22.3179	16.0965	21.5632	0.115629	0.597883	0.66437	17.7832	-1.491	-33.005
27	2	Padus buergeriana	A	Deciduous	8	62.578	1.10504	61.1445	2.51741	1.89218	14.8153	0.647071	24.9829	22.1225	15.8142	24.2886	0.100766	0.593019	0.669694	13.3043	0.592	-33.128
28	3	Padus buergeriana	A	Deciduous	8	62.578	1.10504	60.6477	3.18761	1.58303	14.5698	0.563249	24.3092	21.9431	14.3604	19.0261	0.131128	0.599354	0.663983	20.1361	1.452	-31.696
29	4	Padus buergeriana	A	Deciduous	8	62.578	1.10504	62.5074	3.23352	1.42687	13.7147	0.684648	23.679	21.7249	15.7763	19.3311	0.136556	0.579192	0.631289	22.6617	-1.824	-32.242
30	5	Padus buergeriana	A	Deciduous	8	62.578	1.10504	61.2301	2.61865	1.48984	14.713	0.69764	22.5353	23.8569	17.2696	23.3823	0.116202	0.652886	0.61672	17.5767	-2.25	-32.544
31	1	Rhododendron latoucheae	A	Evergreen	7	54.7416	4.10033	59.2953	0.981441	1.02619	7.62876	1.09017	25.2276	17.0718	19.7372	60.4166	0.0389035	0.302398	0.446864	9.56393	-2.21	-32.436
32	2	Rhododendron latoucheae	A	Evergreen	7	54.7416	4.10033	60.1162	0.973436	0.658553	8.84021	2.0409	25.129	17.5709	20.0474	61.7567	0.0387376	0.351794	0.503115	14.7814	-1.172	-31.692
33	3	Rhododendron latoucheae	A	Evergreen	7	54.7416	4.10033	58.6969	0.844178	0.634783	6.98029	1.68375	24.2762	16.3269	20.3065	69.5314	0.0347738	0.287536	0.427534	13.2987	-2.693	-30.793
34	4	Rhododendron latoucheae	A	Evergreen	7	54.7416	4.10033	58.9506	0.910443	0.805747	7.76705	1.73546	29.0198	18.9707	20.0841	64.7493	0.0313732	0.267647	0.409424	11.2994	1.653	-31.765
35	5	Rhododendron latoucheae	A	Evergreen	7	54.7416	4.10033	60.4593	0.873781	1.60571	8.94349	1.78119	24.7136	17.4842	20.1744	69.1927	0.0353564	0.361886	0.51152	5.4417	-1.306	-31.306
36	1	Quercus acutissima	A	Deciduous	8	81.635	2.60287	57.478	1.7521	2.62078	11.9283	1.71871	25.1687	24.5939	19.8609	32.8051	0.0696145	0.473936	0.485012	6.68543	-2.728	-30.8
37	2	Quercus acutissima	A	Deciduous	8	81.635	2.60287	58.5323	2.385	1.38026	13.6808	1.02226	28.6896	25.0442	18.5172	24.5418	0.0831314	0.476857	0.546267	17.2793	0.086	-31.3
38	3	Quercus acutissima	A	Deciduous	8	81.635	2.60287	58.6852	2.04742	1.19262	12.7272	1.39807	21.8798	24.598	19.9433	28.663	0.093576	0.58169	0.517411	17.1675	-0.863	-31.635
39	4	Quercus acutissima	A	Deciduous	8	81.635	2.60287	58.852	1.79977	1.18683	14.1026	1.57999	22.8922	25.9385	18.7251	32.6997	0.0786194	0.616045	0.543696	15.1646	-0.945	-31.392
40	5	Quercus acutissima	A	Deciduous	8	81.635	2.60287	52.9011	1.72961	1.07118	11.0826	1.66171	22.4073	25.6591	19.1073	30.5856	0.0771897	0.494599	0.431917	16.1468	1.309	-31.367
41	1	Castanopsis carlesii	A	Evergreen	13	58.8744	1.97523	57.0405	1.73185	1.21515	6.71471	1.35585	25.7528	24.205	21.4522	32.9362	0.0672488	0.260737	0.27741	14.2521	0.926	-33.198
42	2	Castanopsis carlesii	A	Evergreen	13	58.8744	1.97523	56.2688	1.51672	1.04804	6.76429	1.47881	25.6843	21.4924	21.4941	37.0991	0.0590523	0.263363	0.314729	14.4719	-1.103	-31.978
43	3	Castanopsis carlesii	A	Evergreen	13	58.8744	1.97523	54.6438	1.17107	0.898844	7.33209	1.81744	25.4395	24.3923	22.4767	46.6613	0.0460338	0.288217	0.30059	13.0287	-1.726	-32.012
44	4	Castanopsis carlesii	A	Evergreen	13	58.8744	1.97523	54.2959	1.46807	1.1385	7.48068	1.50538	21.8933	24.6121	21.614	36.9847	0.0670554	0.341688	0.303943	12.8947	-0.467	-32.074
45	5	Castanopsis carlesii	A	Evergreen	13	58.8744	1.97523	52.7396	1.49022	1.02147	6.60179	1.64171	23.9658	25.5178	19.3349	35.3904	0.0621813	0.275467	0.258713	14.589	-0.798	-31.236
46	1	Schima superba	A	Evergreen	12	68.036	2.85228	50.6643	1.33539	1.05597	8.10712	2.09175	24.6505	20.928	18.3674	37.9396	0.0541732	0.328883	0.387381	12.6461	1.385	-31.358
47	2	Schima superba	A	Evergreen	12	68.036	2.85228	55.3223	1.65341	1.08966	8.04585	1.90002	26.0529	21.6094	23.3498	33.4595	0.0634636	0.308828	0.37233	15.1737	0.642	-28.894
48	3	Schima superba	A	Evergreen	12	68.036	2.85228	50.7179	1.53354	0.82924	11.5248	1.72084	26.6319	22.6778	21.2775	33.0724	0.0575829	0.432742	0.508197	18.4934	-0.027	-29.113
49	4	Schima superba	A	Evergreen	12	68.036	2.85228	53.4596	1.57599	1.02407	9.70394	2.00284	23.5214	22.5733	21.0249	33.9212	0.0670026	0.412558	0.429887	15.3895	-0.351	-29.611
50	5	Schima superba	A	Evergreen	12	68.036	2.85228	50.3025	1.16081	1.06747	8.39271	2.01672	22.2679	22.2258	21.1646	43.334	0.0521293	0.376898	0.377611	10.8744	-0.321	-29.483
51	1	Choerospondias axillaris	A	Deciduous	18	96.7014	2.70223		1.48122	1.18743	9.59797	2.05535	34.5227	28.6041	16.8936		0.0429058	0.27802	0.335546	12.4742	-1.414	-25.473
52	2	Choerospondias axillaris	A	Deciduous	18	96.7014	2.70223	53.347	1.5123	1.62171	7.694	1.8742	29.783	27.4846	18.4854	35.2753	0.0507773	0.258335	0.279939	9.32535	-3.312	-30.498
53	3	Choerospondias axillaris	A	Deciduous	18	96.7014	2.70223	49.7815	1.29703	1.47167	8.5686	2.10101	31.6862	26.1716	15.4429	38.3812	0.0409337	0.270421	0.327401	8.81334	-2.118	-32.163
54	4	Choerospondias axillaris	A	Deciduous	18	96.7014	2.70223	51.1939	1.68728	1.01161	9.107	1.61372	21.4592	27.0403	18.4289	30.3411	0.0786273	0.424386	0.336793	16.6791	-2.572	-29.656
55	5	Choerospondias axillaris	A	Deciduous	18	96.7014	2.70223	51.7899	1.10469	1.3109	9.01589	2.52224	34.759	26.2536	19.3913	46.8819	0.0317814	0.259383	0.343415	8.42696	-2.627	-30.208
56	1	Elaeocarpus japonicus	A	Evergreen	1	35.4126	2.12808	51.5474	1.59714	1.59945	12.2655	1.70205	19.0058	21.7666	18.6592	32.2748	0.0840344	0.645355	0.5635	9.98557	-0.978	-31.487
57	2	Elaeocarpus japonicus	A	Evergreen	1	35.4126	2.12808	51.7697	1.31008	1.62955	11.6762	1.98117	24.5904	22.2317	18.8363	39.5165	0.053276	0.474826	0.525205	8.03954	-1.137	-30.752
58	3	Elaeocarpus japonicus	A	Evergreen	1	35.4126	2.12808	51.652	1.28321	1.63333	10.804	2.07979	24.3807	23.5622	18.3745	40.2524	0.0526321	0.443138	0.458531	7.85636	-4.062	-29.607
59	4	Elaeocarpus japonicus	A	Evergreen	1	35.4126	2.12808	54.5535	1.82775	0.663243	14.5538	1.67934	25.098	22.5321	17.8687	29.8473	0.0728245	0.579878	0.645915	27.5578	-2.642	-29.359
60	5	Elaeocarpus japonicus	A	Evergreen	1	35.4126	2.12808	54.9904	1.42197	0.781013	12.9517	2.50184	25.2612	23.1237	19.5656	38.6721	0.0562904	0.51271	0.560104	18.2067	-3.501	-29.213
61	1	Acer wilsonii	A	Deciduous	10	62.885	1.0465	52.4669	2.20098	1.73836	8.1145	1.17802	19.8047	20.9826	21.5581	23.838	0.111134	0.409726	0.386725	12.6612	-0.312	-31.859
62	2	Acer wilsonii	A	Deciduous	10	62.885	1.0465	52.0794	2.18182	1.84286	9.11124	1.31374	18.3493	20.2656	21.2972	23.8698	0.118905	0.496546	0.449592	11.8393	0.875	-31.634
63	3	Acer wilsonii	A	Deciduous	10	62.885	1.0465	52.4523	2.44434	1.63429	7.36026	1.30683	17.9424	19.2981	21.4173	21.4587	0.136233	0.410217	0.381397	14.9567	-0.803	-31.466
64	4	Acer wilsonii	A	Deciduous	10	62.885	1.0465	51.227	2.01828		8.70645	2.01315	20.3595	21.1664	20.9956	25.3815	0.0991323	0.427636	0.411333		-1.156	-31.031
65	5	Acer wilsonii	A	Deciduous	10	62.885	1.0465	50.6883	2.55679	1.53276	5.86932	1.16646	17.1742	20.7803	21.9253	19.825	0.148874	0.341753	0.282447	16.6809	0.581	-31.931
66	1	Acer wilsonii	A	Deciduous	12	71.5222	0.407802	51.6882	3.00527	1.10085	10.5825	1.92831	25.479	19.0572	21.8536	17.1992	0.117951	0.415342	0.555301	27.2995	1.995	-31.897
67	2	Acer wilsonii	A	Deciduous	12	71.5222	0.407802	50.8895	2.93591		10.2087	1.74541	24.6372	20.8244	20.0268	17.3335	0.119166	0.414362	0.490227		1.734	-30.917
68	3	Acer wilsonii	A	Deciduous	12	71.5222	0.407802	51.0975	2.97857	1.1404	7.83408	1.20592	20.1559	19.6607	18.06	17.155	0.147777	0.388675	0.398465	26.1187	0.328	-31.769
69	4	Acer wilsonii	A	Deciduous	12	71.5222	0.407802	52.0176	3.15977	1.27368	11.8336	1.76218	24.3619	20.3517	18.8767	16.4625	0.129701	0.485743	0.581458	24.8081	2.274	-31.929
70	5	Acer wilsonii	A	Deciduous	12	71.5222	0.407802	50.1693	2.46104	1.08052	13.1607	1.07645	24.795	20.969	19.1684	20.3854	0.0992555	0.53078	0.627625	22.7765	-0.976	-31.65
